# Supplementary material for: Learning from small data: Classifying sex from retinal images via deep learning
Source: PubMed Central journal article supplement (PMC10399793; doi:10.1371/journal.pone.0289211), 2023-08-03

# ValidationSet

Epoch: 1

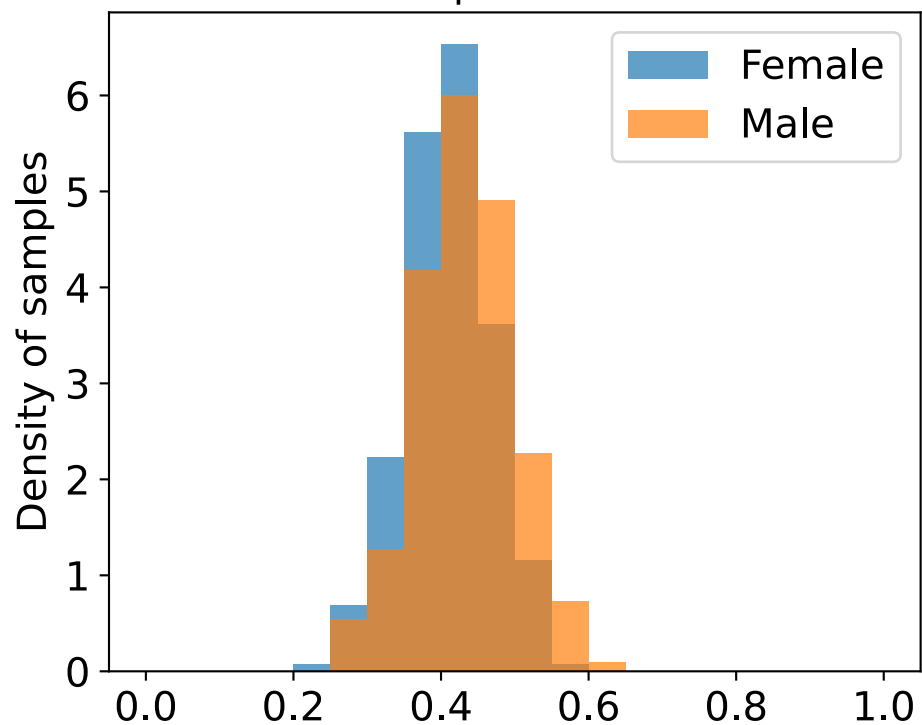

Epoch: 10

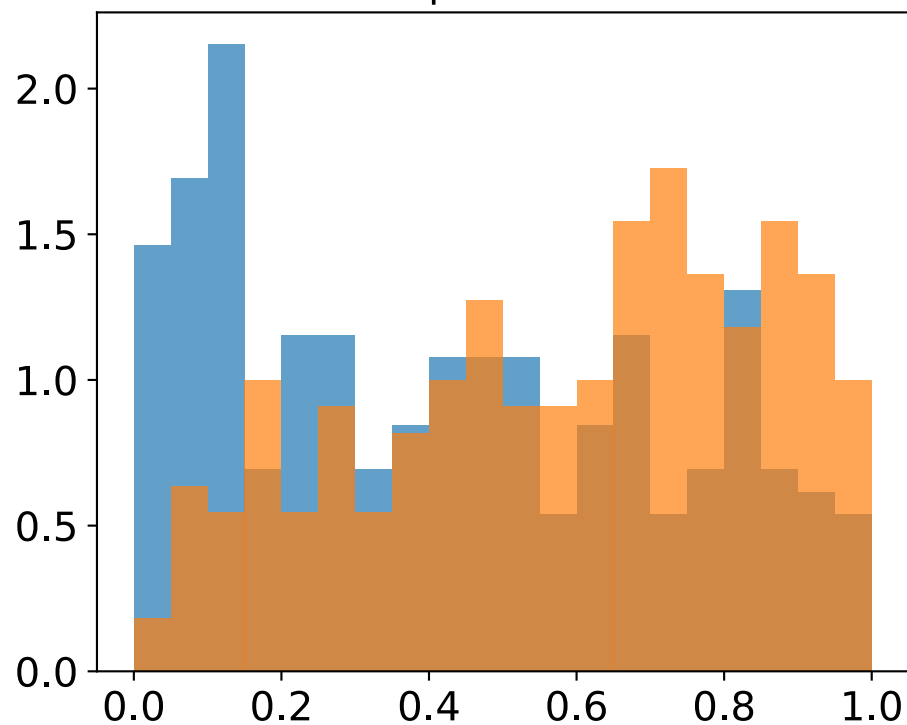

Epoch: 25

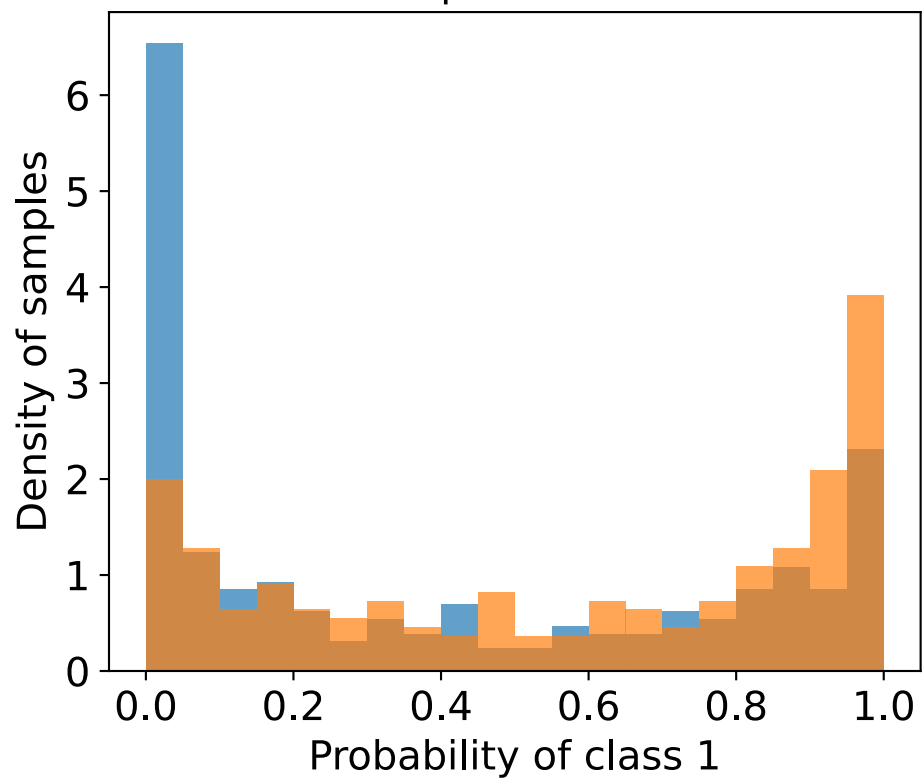

Epoch: 100

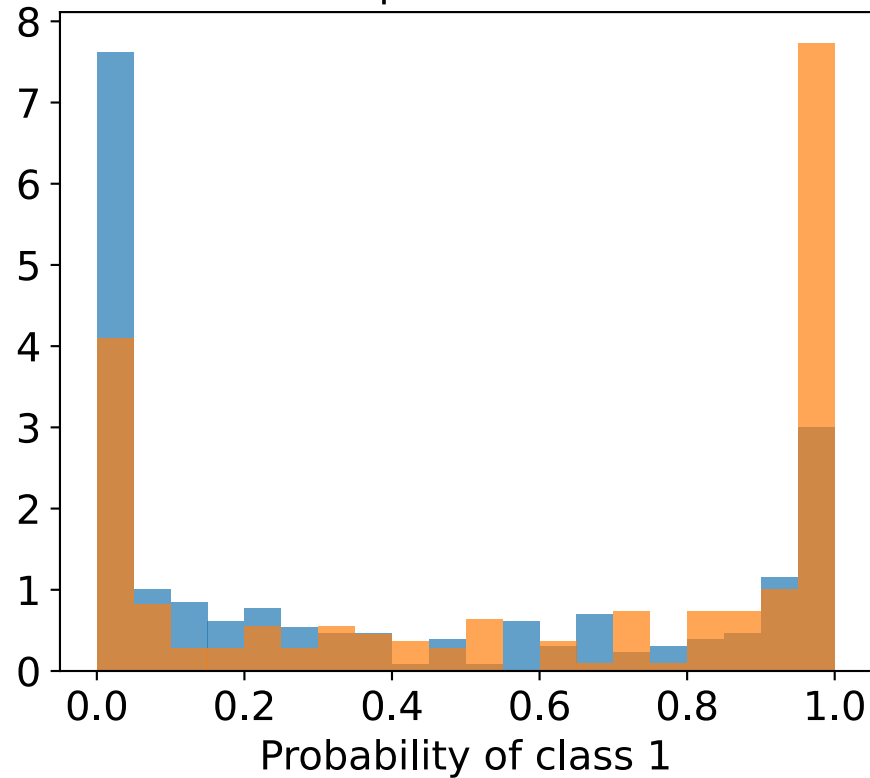

Supplement: pone.0289211.s003.pdf [file pone.0289211.s003.pdf]
