# Supplementary material for: Learning from small data: Classifying sex from retinal images via deep learning
Source: PubMed Central journal article supplement (PMC10399793; doi:10.1371/journal.pone.0289211), 2023-08-03

train

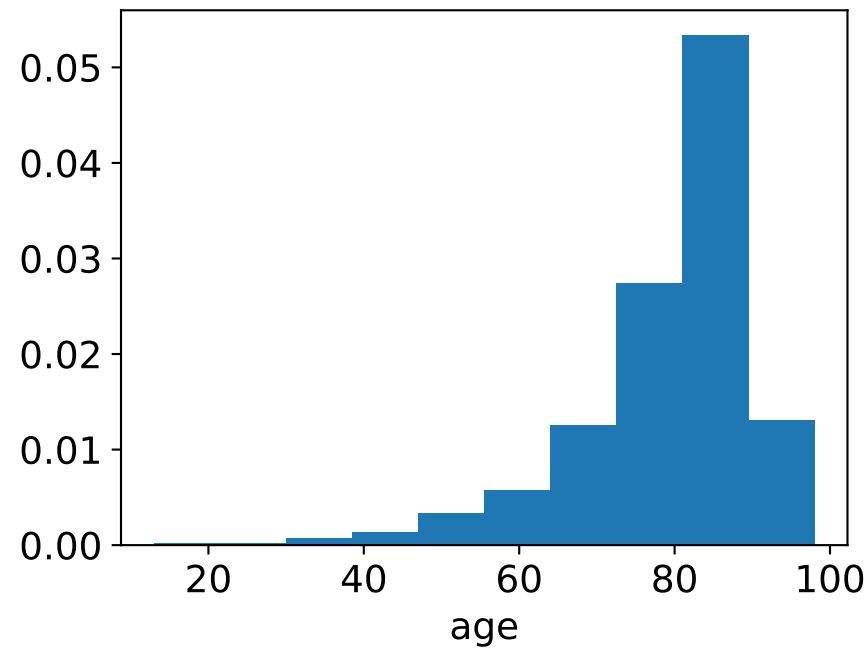

val

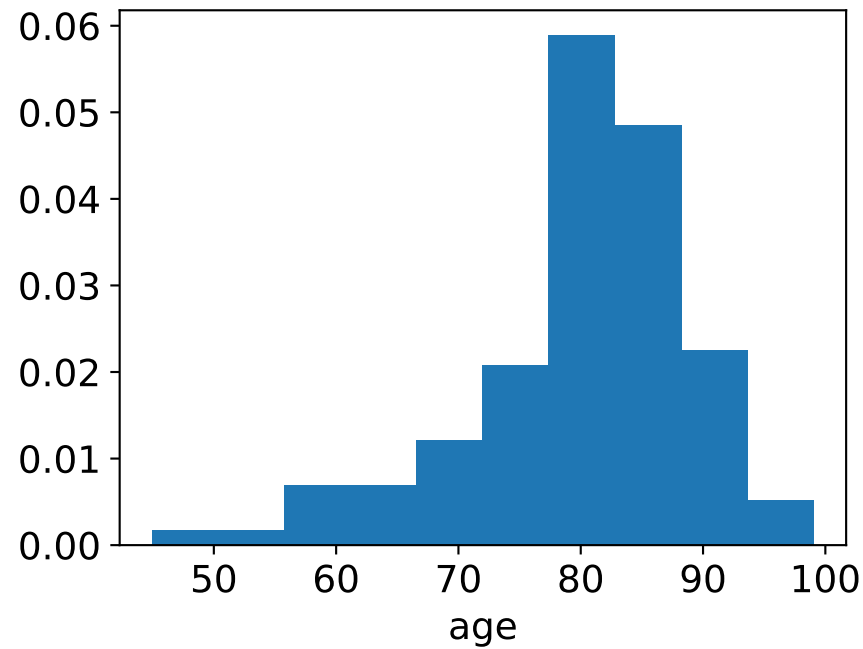

test

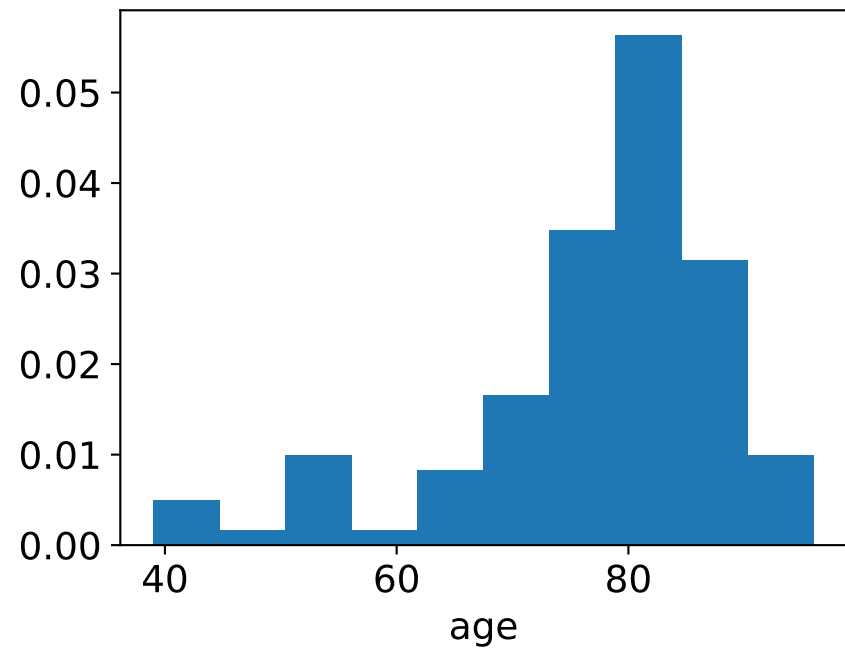

train

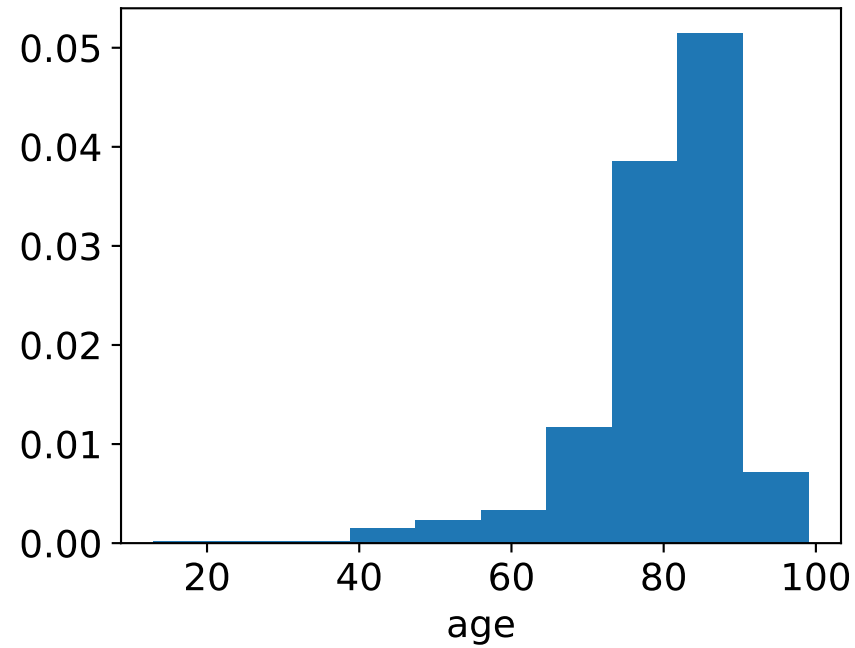

val

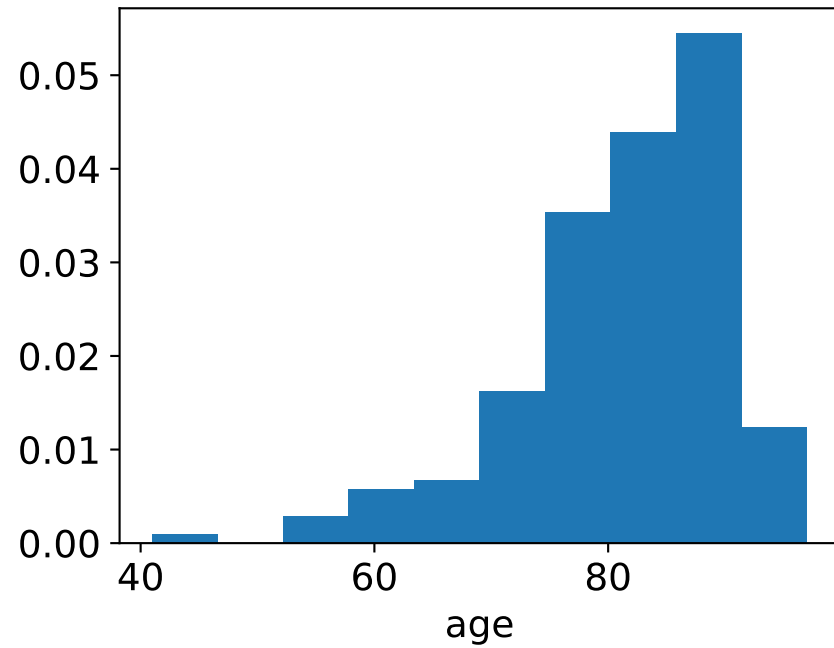

test

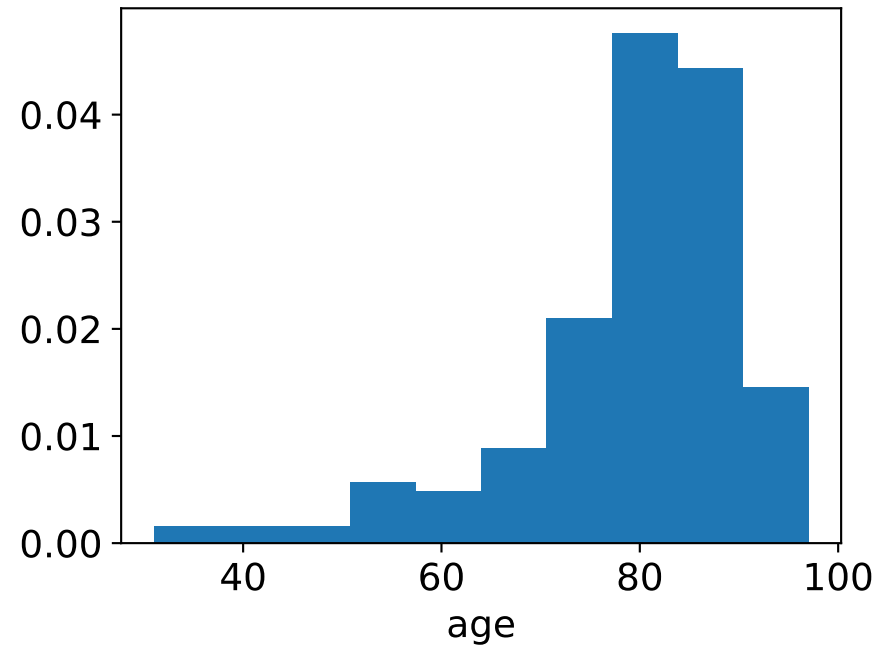

Supplement: pone.0289211.s007.pdf [file pone.0289211.s007.pdf]
